# Supplementary material for: Fibroblast subtypes define a metastatic matrisome in breast cancer
Source: JCI journal article supplement (doi:10.1172/jci.insight.130751), 2020-02-11
Supplement: sd1 [file 1]

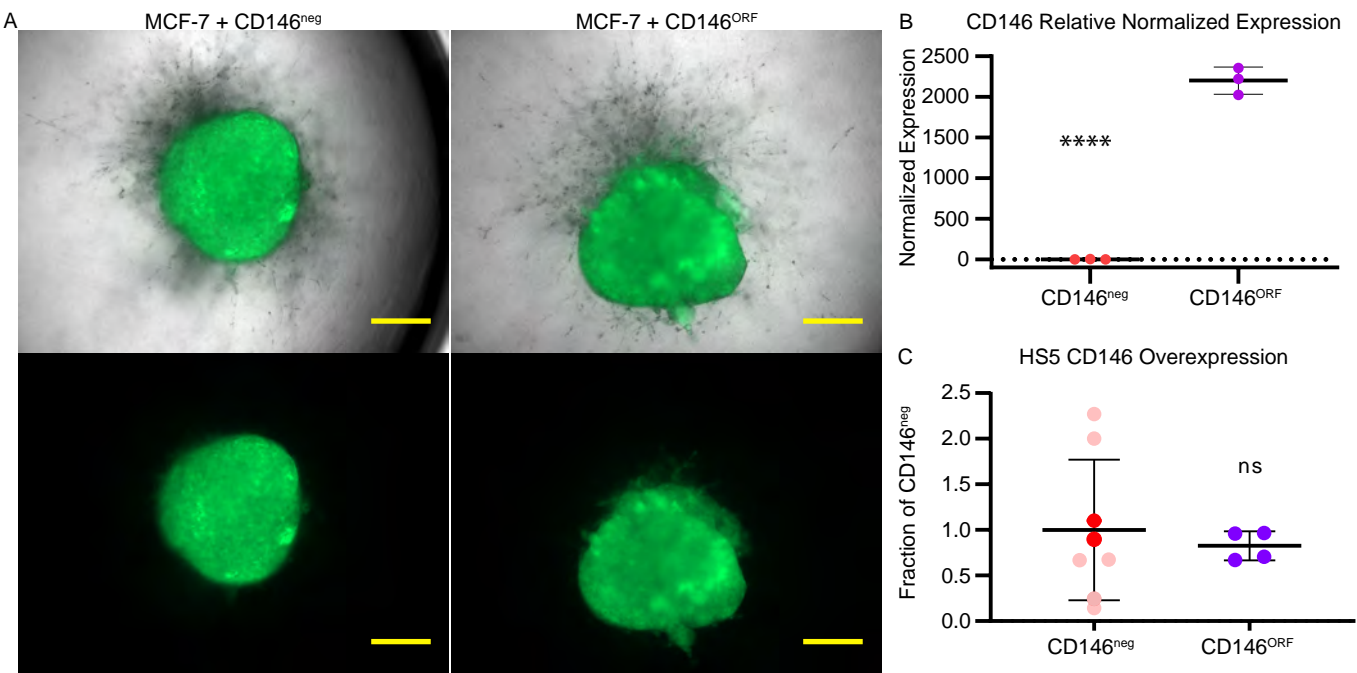

Supplemental Figure 2. MCF-7 invasion is not inhibited by CD146 over-expression in CD146<sup>neg</sup> CAFs. (A) CD146<sup>neg</sup> CAFs were generated to stably express CD146 (CD146<sup>ORF</sup>) and grown in spheroid co-cultures with MCF-7 cells to determine if CD146 expression was responsible for invasion induced by CD146<sup>neg</sup> CAFs. (B) Generation of CD146 mRNA was verified by qPCR. (C) Quantification of MCF-7 cells mixed with native CD146<sup>neg</sup> CAFs (dark red dots) or CD146<sup>neg</sup> CAFs expressing an ORF vector for red fluorescent protein (pink dots) or with CD146<sup>ORF</sup> CAFs (purple dots). Invasion was measured for each sphere as described in the methods section and illustrated in Supplemental Figure 4. MCF-7 invasion was not significantly different between CD146<sup>ORF</sup> CAFs or with either CD146<sup>neg</sup> CAF group, which each had no expression for CD146, ns = not significant. An unpaired t-test was used to determine statistical significance using GraphPad Prism 8.3.0 and defined as  $p < 0.05$ ; scale bars are 500 $\mu$ m.

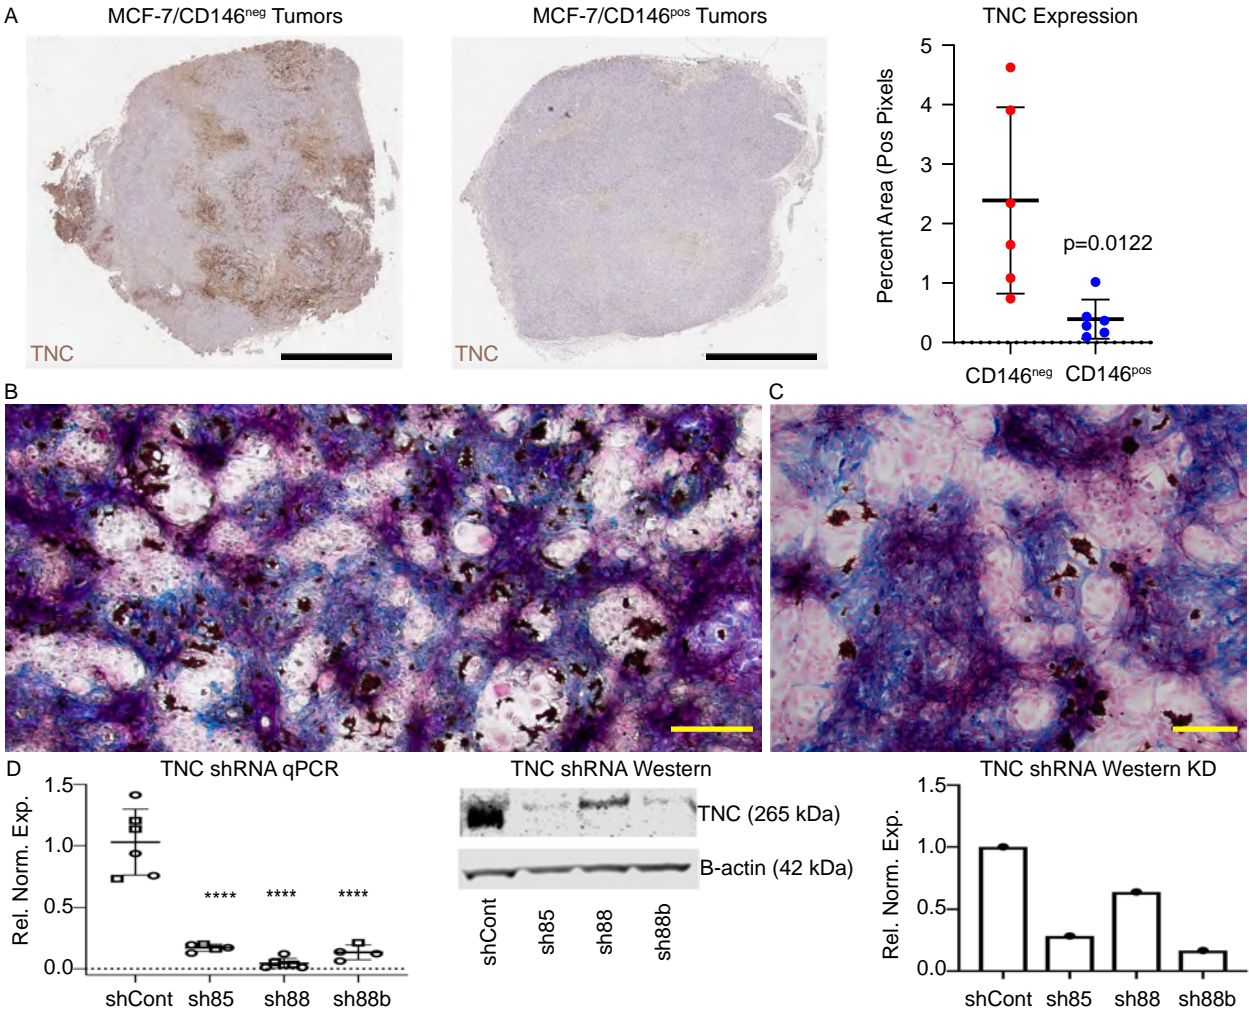

Supplemental Figure 3. TNC is expressed more in tumors with CD146<sup>neg</sup> CAFs. (A) Immunohistochemistry for human specific TNC showed that MCF-7 tumors bearing CD146<sup>neg</sup> CAFs expressed significantly more TNC compared to tumors with CD146<sup>pos</sup> CAFs. Representative (B) 10X and (C) 20X images of a 72 hour co-culture of MCF-7 cells mixed with CD146<sup>neg</sup> and CD146<sup>pos</sup> CAFs. The cultures were stained using IHC methods for CDCP1 (blue stain marking CD146<sup>neg</sup> CAFs), pan-cytokeratin (brown marking MCF-7 cells), TNC (purple) and Nuclear Fast Red (used to highlight presence of CD146<sup>pos</sup> CAFs). TNC staining is strictly confined to areas populated by CD146<sup>neg</sup> CAFs. Scale bars are 400µm and 200µm respectively. (D) qPCR and western blot analysis shows significant knockdown of TNC by shRNA in three different knockdown cell lines. TNC expression was analyzed by an unpaired t-test and TNC shRNA qPCR was analyzed with ordinary one-way ANOVA followed by Dunnet's multiple comparisons test. Scale bars = 2cm. \*\*\*\*p<0.0001.

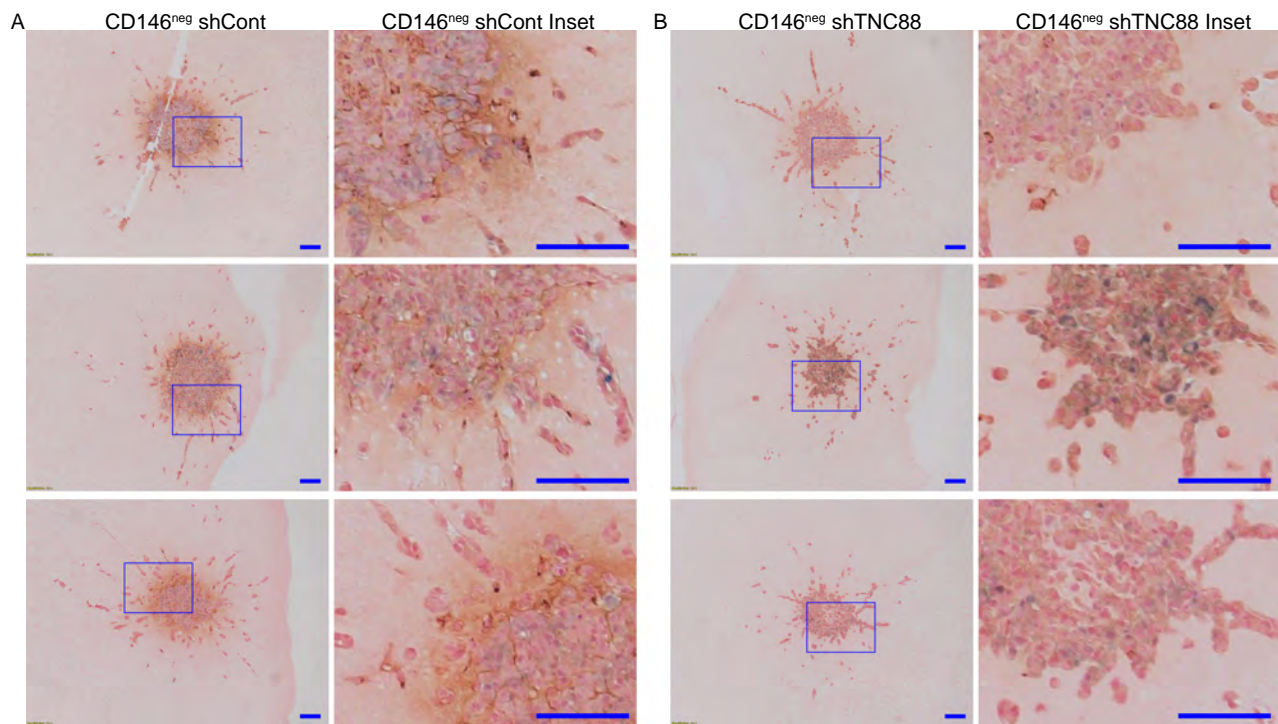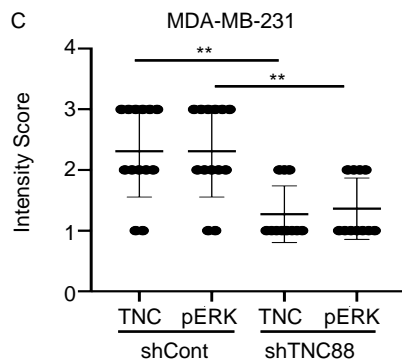

Supplemental Figure 4. MDA-MB-231 spheroid invasion fronts expressing TNC have significantly more pERK expression. MDA-MB-231 spheroids were co-cultured with CD146<sup>neg</sup> CAFs expressing (A) control shRNA or (B) shRNA against TNC. Immunohistochemistry for phospho-ERK (pERK, blue) and TNC (brown) in 3 representative spheroids and counterstained with Nuclear Fast Red. Insets are marked by a blue box. (C) Intensity scores on a scale of 1-3 (1 = minimal staining, 2 = moderate staining, 3 = intense staining) for pERK and TNC. 4-6 serial images were scored per spheroid with N = 3 spheroids per group. Scale bars are 100μm. \*\*\*\*p<0.0001; statistics were completed using an ordinary 1-way ANOVA followed by Tukey's multiple comparison test.



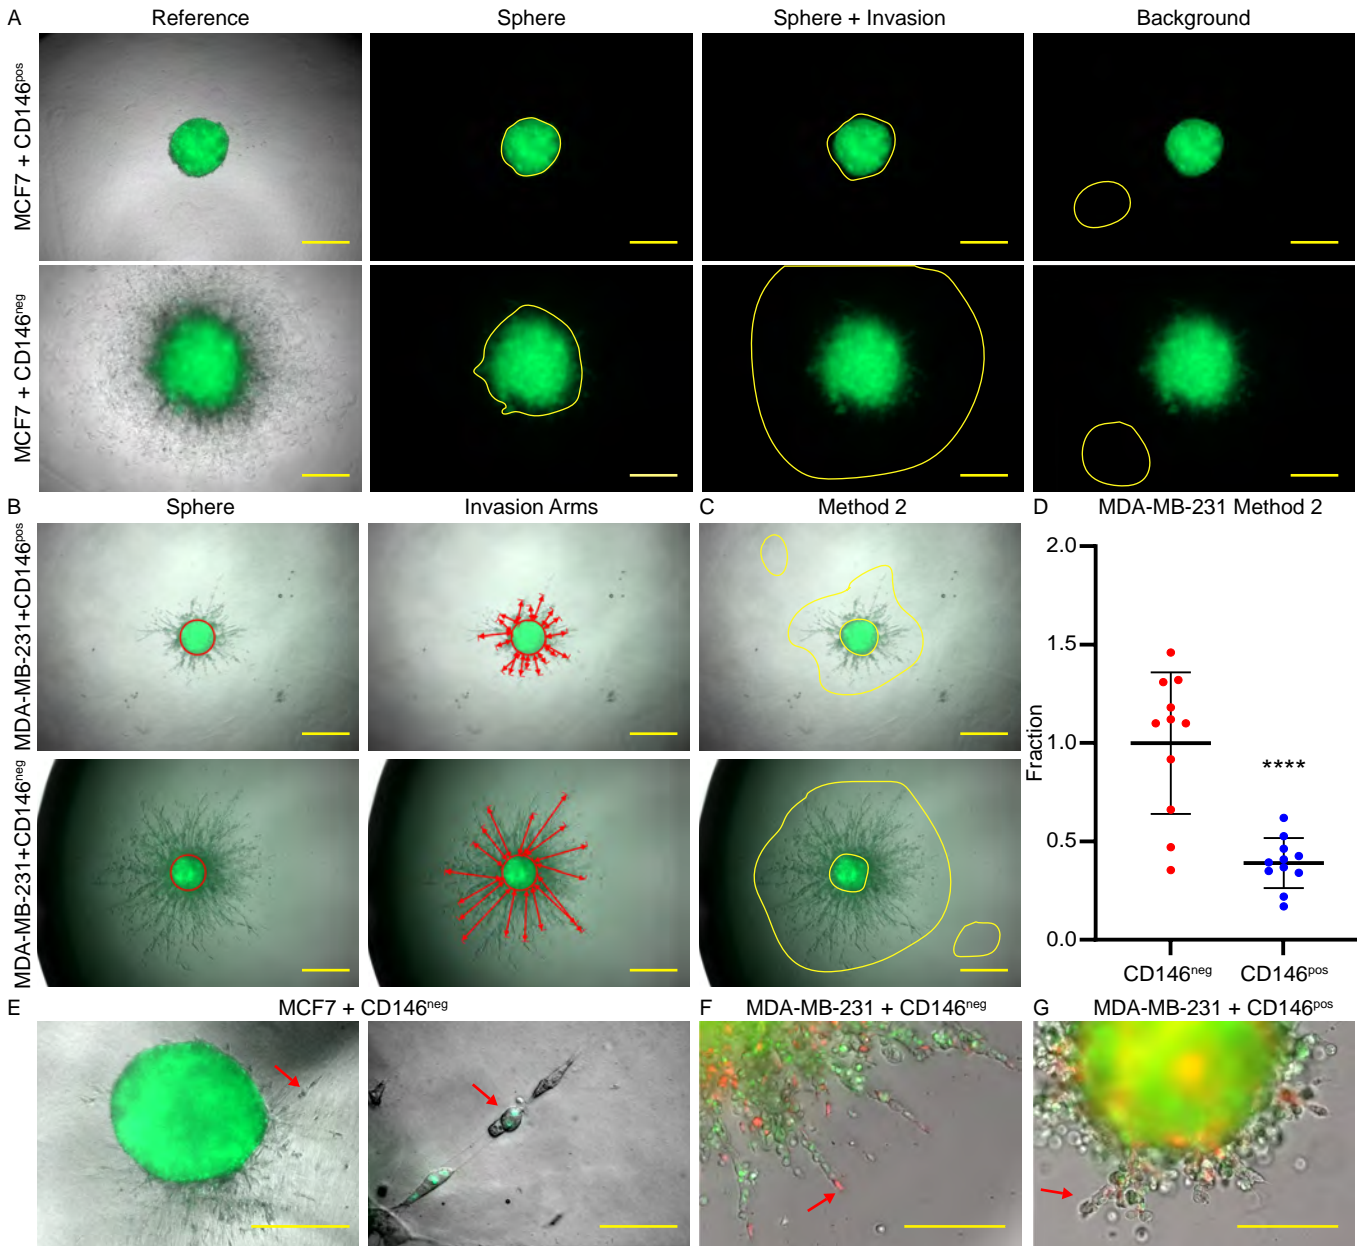

**Supplemental Figure 5. Illustration of how spheroid invasion was quantified.** Refer to the manuscript methods section for a detailed description on the methods used to measure invasion in the co-culture spheroid assays. (A) Representative image series showing how invasion for unlabeled CAF co-cultured spheroids mixed with GFP-labelled MCF-7 cells was measured. (B) Representative image series showing how invasion for CAF co-cultured spheroids mixed with GFP-labelled MDA-MB-231 cells was measured. (C) Re-analysis of the image series in panel B using the method described for MCF-7 spheroids. (D) Quantification of MDA-MB-231 invasion in co-cultures with CAF subtypes which were re-analyzed using the method for MCF-7 spheroids to demonstrate the consistency between methods used for MDA-MB-231 spheroids and to validate the method used for MCF-7 spheroids. (E) MCF-7/CD146<sup>neg</sup> CAF co-cultured spheroid at 10X magnification and a single arm at 40X magnification. (F-G) High resolution images captured at 20X for GFP-labelled MDA-MB-231 cells co-cultured in spheroid assays with (F) RFP-labelled CD146<sup>neg</sup> CAFs or (G) RFP-labelled CD146<sup>pos</sup> CAFs. Arrows indicate invasion arms comprised of CAFs and MDA-MB-231 cells with several arms of the MDA-MB-231/CD146<sup>neg</sup> CAF spheroid co-culture being tipped by CAFs. Scale bars are 500µm (A, B, C, E) and 200µm (F-G); N = 11 spheroids analyzed in each group, statistical analysis was done by unpaired t-test using GraphPad Prism 8.3.0.; \*\*\*\* =  $p < 0.0001$ . Disclosure: The Reference panels for MCF7 + CD146<sup>pos</sup> and MCF7 + CD146<sup>neg</sup> in A of this figure are repeat images, previously shown in the main text Figure 10A panels for MCF-7/CD146<sup>neg</sup> and MCF-7/CD146<sup>pos</sup>. Panels F (MDA-MB-231 + CD146<sup>neg</sup>) and G (MDA-MB-231 + CD146<sup>pos</sup>) in this figure are higher magnification images previously shown in the main text Figure 6B. The images in panels F and G have been rotated in comparison to the main text Figure 6B images.

Supplemental Table 1. ECM proteins expressed significantly different in MCF-7 tumors with CD146<sup>neg</sup> versus CD146<sup>pos</sup>.

| <b>Human Specific Protein</b>                                        | <b>FC (CD146<sup>neg</sup> vs CD146<sup>pos</sup>)</b> | <b>p-value</b> |
|----------------------------------------------------------------------|--------------------------------------------------------|----------------|
| Agrin                                                                | CD146 <sup>pos</sup>                                   | --             |
| Collagen alpha-1(XVIII) chain                                        | 0.51                                                   | 0.014          |
| Thrombospondin-1                                                     | 0.46                                                   | 0.009          |
| Biglycan                                                             | 8.35                                                   | 0.034          |
| Brevican core protein                                                | 2.70                                                   | 0.028          |
| Collagen alpha-1(IV) chain                                           | CD146 <sup>neg</sup>                                   | --             |
| Collagen alpha-1(VI) chain                                           | 10.11                                                  | 0.021          |
| Collagen alpha-2(I) chain                                            | 14.84                                                  | 0.031          |
| Collagen alpha-2(VI) chain                                           | 12.15                                                  | 0.021          |
| Collagen alpha-3(V) chain                                            | CD146 <sup>neg</sup>                                   | --             |
| Decorin                                                              | CD146 <sup>neg</sup>                                   | --             |
| EMILIN-1                                                             | CD146 <sup>neg</sup>                                   | --             |
| Extracellular matrix protein 1                                       | CD146 <sup>neg</sup>                                   | --             |
| Fibrillin-1                                                          | CD146 <sup>neg</sup>                                   | --             |
| Fibronectin                                                          | 50.37                                                  | 0.001          |
| Latent-transforming growth factor beta-binding protein 1             | 5.19                                                   | 0.022          |
| Latent-transforming growth factor beta-binding protein 2             | CD146 <sup>neg</sup>                                   | --             |
| Tenascin-C                                                           | 21.18                                                  | 0.002          |
| <b>Shared Protein</b>                                                | <b>FC (CD146<sup>neg</sup> vs CD146<sup>pos</sup>)</b> | <b>p-value</b> |
| Asporin                                                              | 0.35                                                   | 0.018          |
| Basement membrane-specific heparan sulfate proteoglycan core protein | 0.52                                                   | 0.049          |
| Biglycan                                                             | 0.44                                                   | 0.043          |
| Collagen alpha-1(I) chain                                            | 0.28                                                   | 0.018          |
| Collagen alpha-1 (IV) chain                                          | 0.35                                                   | 0.025          |
| Collagen alpha-(V) chain                                             | 0.40                                                   | 0.027          |
| Collagen alpha-1(VI) chain                                           | 0.35                                                   | 0.014          |
| Collagen alpha-1(XVIII) chain                                        | 0.49                                                   | 0.004          |
| Collagen alpha-1/5(IV) chain (Arresten/Core Protein)                 | 0.47                                                   | 0.001          |
| Collagen alpha-2(I) chain                                            | 0.30                                                   | 0.013          |
| Collagen alpha-2(VI) chain                                           | 0.38                                                   | 0.002          |
| Collagen alpha-2(V) chain                                            | 0.39                                                   | 0.019          |
| Collagen alpha-2(VI) chain                                           | 0.47                                                   | 0.048          |
| Dermatopontin                                                        | 0.38                                                   | 0.024          |
| Fibromodulin                                                         | 0.35                                                   | 0.010          |
| Laminin subunit alpha-1                                              | CD146 <sup>pos</sup>                                   | --             |
| Laminin subunit beta-1                                               | 0.08                                                   | 0.055          |
| Laminin subunit beta-2                                               | 0.28                                                   | 0.011          |
| Laminin subunit gamma-1                                              | 0.11                                                   | 0.046          |
| Lumican                                                              | 0.38                                                   | 0.023          |
| Mimecan                                                              | 0.28                                                   | 0.007          |
| Nidogen 1/2 (osteonidogen)                                           | 0.16                                                   | 0.024          |
| Nidogen-1                                                            | 0.16                                                   | 0.019          |
| Prolargin                                                            | 0.29                                                   | 0.016          |
| Thrombospondin-1                                                     | 0.47                                                   | 0.027          |
| Thrombospondin-2                                                     | 0.66                                                   | 0.021          |

|                                                                      |                                                        |                |
|----------------------------------------------------------------------|--------------------------------------------------------|----------------|
| Transglutaminase 2                                                   | 0.43                                                   | 0.051          |
| Fibronectin 1                                                        | 2.99                                                   | 0.002          |
| Fibronectin 1 (Anastellin/type-III domain)                           | 2.75                                                   | 0.001          |
| Fibronectin 1 (type-III 13 domain)                                   | 12.86                                                  | 0.004          |
| Fibronectin 1 (type-III 4 domain)                                    | 65.07                                                  | 0.001          |
| Fibronectin 1 (type-III 7 domain)                                    | 2.81                                                   | 0.003          |
| Fibronectin 1 (type-III 9 domain)                                    | 1.64                                                   | 0.031          |
| Fibulin-1                                                            | 1.48                                                   | 0.029          |
| Latent-transforming growth factor beta-binding protein 1             | CD146 <sup>neg</sup>                                   | --             |
| Lysyl oxidase                                                        | CD146 <sup>neg</sup>                                   | --             |
| Vimentin                                                             | 3.21                                                   | 0.020          |
| <b>Mouse Specific Protein</b>                                        | <b>FC (CD146<sup>neg</sup> vs CD146<sup>pos</sup>)</b> | <b>p-value</b> |
| Basement membrane-specific heparan sulfate proteoglycan core protein | 0.45                                                   | 0.017          |
| Biglycan                                                             | 0.41                                                   | 0.043          |
| Collagen alpha-1(IV) chain                                           | 0.36                                                   | 0.003          |
| Collagen alpha-1(VI) chain                                           | 0.31                                                   | 0.016          |
| Collagen alpha-1(XVIII) chain                                        | 0.49                                                   | 0.020          |
| Collagen alpha-2(VI) chain                                           | 0.44                                                   | 0.001          |
| Collagen alpha-3(IV) chain                                           | 0.38                                                   | 0.003          |
| Collagen alpha-3(VI) chain                                           | 0.35                                                   | 0.015          |
| Decorin                                                              | 0.20                                                   | 0.018          |
| Dermatopontin                                                        | 0.40                                                   | 0.025          |
| Galectin-7                                                           | CD146 <sup>pos</sup>                                   | --             |
| Insulin-like growth factor-binding protein 7                         | 0.35                                                   | 0.006          |
| Laminin subunit alpha-1                                              | CD146 <sup>pos</sup>                                   | --             |
| Laminin subunit beta-2                                               | 0.31                                                   | 0.033          |
| Laminin subunit gamma-1                                              | 0.08                                                   | 0.049          |
| Lumican                                                              | 0.43                                                   | 0.042          |
| Mimecan                                                              | 0.33                                                   | 0.003          |
| Nidogen-1                                                            | 0.11                                                   | 0.037          |

Fold change normalized to total protein expression. CD146<sup>pos</sup> = only detected in tumors with CD146<sup>pos</sup> CAFs; CD146<sup>neg</sup> = only detected in tumors with CD146<sup>neg</sup> CAFs.

Supplemental Table 2. ECM proteins used to generate the gene signature predictive of lymph node involvement.

| Observed vs Expected Lymph Node Metastasis |            |         |            |         |            |         |
|--------------------------------------------|------------|---------|------------|---------|------------|---------|
| Gene (individual)                          | T1 obs/exp | T1 pval | T2 obs/exp | T2 pval | T3 obs/exp | T2 pval |
| human isoform                              |            |         |            |         |            |         |
| COL6A1                                     | 0.148      | 0.203   | 0.089      | 0.105   | -0.015     | 1.000   |
| COL5A2                                     | 0.110      | 0.372   | 0.064      | 0.256   | -0.015     | 1.000   |
| FN1                                        | 0.110      | 0.372   | 0.035      | 0.570   | -0.089     | 0.343   |
| BGN                                        | 0.127      | 0.307   | 0.127      | 0.019   | 0.045      | 0.704   |
| COL1A2                                     | 0.175      | 0.126   | 0.127      | 0.019   | -0.046     | 0.704   |
| TGFB1                                      | 0.105      | 0.372   | 0.013      | 0.871   | -0.212     | 0.022   |
| COL6A3                                     | 0.228      | 0.041   | 0.163      | 0.002   | -0.110     | 0.254   |
| COL5A3                                     | 0.253      | 0.022   | 0.047      | 0.417   | -0.046     | 0.704   |
| FBN1                                       | 0.175      | 0.126   | 0.107      | 0.051   | -0.046     | 0.704   |
| LTBP2                                      | 0.180      | 0.125   | 0.148      | 0.006   | -0.015     | 1.000   |
| EMILIN1                                    | 0.159      | 0.162   | 0.122      | 0.023   | -0.015     | 1.000   |
| DCN                                        | 0.138      | 0.251   | 0.110      | 0.042   | -0.015     | 1.000   |
| shared isoform                             |            |         |            |         |            |         |
| LOX                                        | 0.164      | 0.107   | 0.107      | 0.051   | -0.015     | 1.000   |
| Gene Signature (total)                     | 0.268      | 0.015   | 0.148      | 0.006   | -0.110     | 0.254   |
